# Supplementary material for: Utilization of Bioflocculants from Flaxseed Gum and Fenugreek Gum for the Removal of Arsenicals from Water
Source: MDPI journal article supplement (doi:10.3390/ma15238691), 2022-12-06
Supplement: s1 [file s1]

## **SUPPLEMENTARY MATERIALS**

### **Utilization of Bioflocculants from Flaxseed Gum and Fenugreek Gum for the Removal of Arsenicals from Water**

**Deysi J. Venegas-García and Lee D. Wilson \***

Department of Chemistry, University of Saskatchewan, 110 Science Place,  
Thorvaldson Building (Room 165), Saskatoon, SK S7N 5C9, Canada

\* Correspondence: [lee.wilson@usask.ca](mailto:lee.wilson@usask.ca)

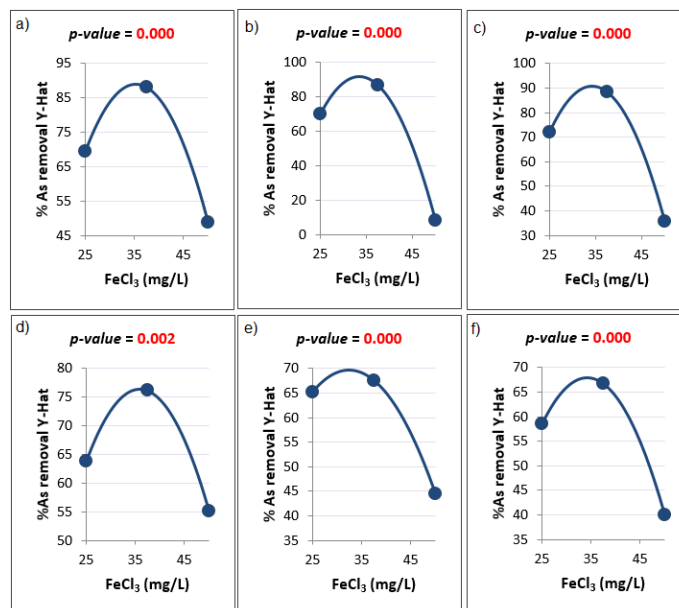

**Figure S1.** Coagulant (mg/L  $\text{FeCl}_3$ ) effect for S1 (Roxarsone) arsenic removal with FSG (a), FGG (b) and XG (c), and S2 arsenic removal with FSG (d), FGG (e) and XG (f). Probability values (p values) less than 0.05 are considered to be statistically significant.

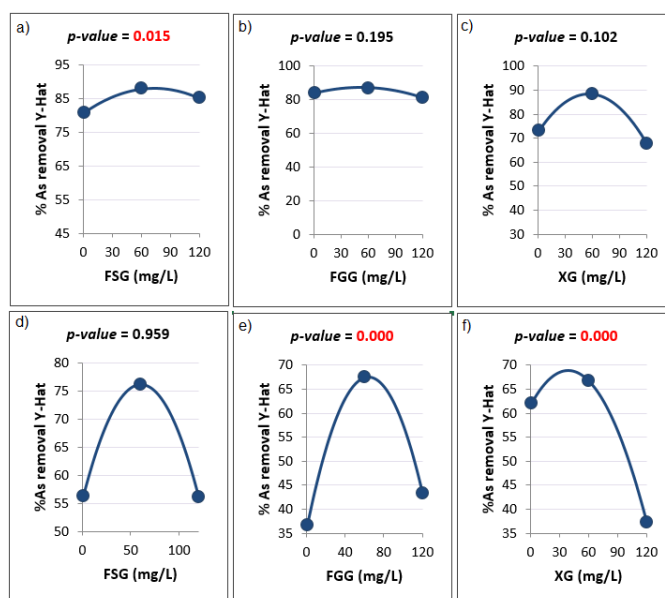

**Figure S2.** Flocculant dosage (mg/L) effect for S1 (Roxarsone) arsenic removal with FSG (a), FGG (b) and XG (c), and S2 arsenic removal with FSG (d), FGG (e) and XG (f). Probability values (p values) less than 0.05 are considered to be statistically significant.

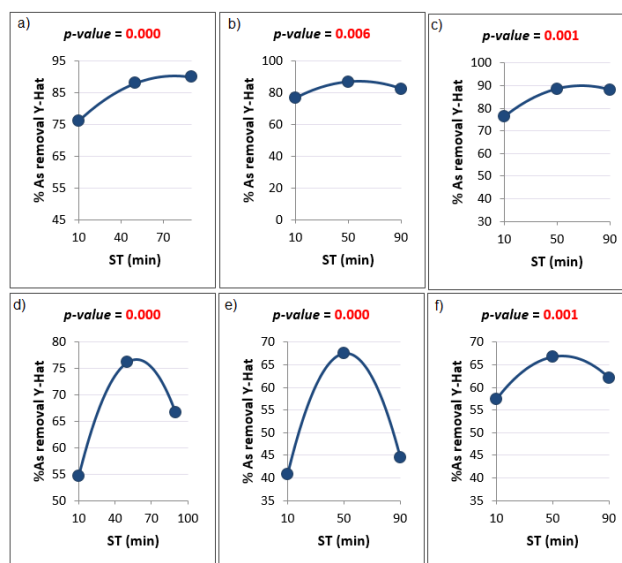

**Figure S3.** Settling time (mg/L) effect for **S1**(Roxarsone) arsenic removal with FSG (a), FGG (b) and XG (c), and **S2** arsenic removal with FSG (d), FGG (e) and XG (f). Probability values (p values) less than 0.05 are considered to be statistically significant.

**Table S1.** ANOVA table for arsenic removal (%) S1-FSG at 295 K.

| SOURCE         | SEQ SS   | ADJ SS   | DF | ADJ MS   | F       | P     | R <sup>2</sup>       | 0.979   |
|----------------|----------|----------|----|----------|---------|-------|----------------------|---------|
| MAIN           | 2,509.5  |          | 3  |          |         |       | Adj R <sup>2</sup>   | 0.9695  |
| COAGULANT (A)  | 1,681.0  | 1,681.0  | 1  | 1,681.0  | 166.642 | 0.000 | Std                  | 3.1761  |
| FLOCCULANT (B) | 72.25    | 72.25    | 1  | 72.25    | 7.1623  | 0.015 | Error                | 103.523 |
| ST (C)         | 756.25   | 756.25   | 1  | 756.25   | 74.969  | 0.000 | Sig F                | 0.0     |
| 2 - WAY        | 603.375  |          | 3  |          |         |       | F <sub>LOF</sub>     | 63.621  |
| AB             | 435.125  | 435.125  | 1  | 435.125  | 43.135  | 0.000 | Sig F <sub>LOF</sub> | 0.0     |
| AC             | 153.125  | 153.125  | 1  | 153.125  | 15.18   | 0.001 |                      |         |
| BC             | 15.125   | 15.125   | 1  | 15.125   | 1.4994  | 0.235 |                      |         |
| QUADRATIC      | 6,285.68 |          | 3  |          |         |       |                      |         |
| AA             | 5,951.34 | 6,183.72 | 1  | 6,183.72 | 613.008 | 0.000 |                      |         |
| BB             | 154.31   | 180.029  | 1  | 180.029  | 17.847  | 0.000 |                      |         |
| CC             | 180.029  | 180.029  | 1  | 180.029  | 17.847  | 0.000 |                      |         |
| REGRESSION     | 9,398.55 | 9,398.55 | 9  | 1,044.28 |         |       |                      |         |
| ERROR          | 201.75   | 201.75   | 20 | 10.088   |         |       |                      |         |
| ERROR PURE     | 16.5     | 16.5     | 17 | 0.9706   |         |       |                      |         |
| ERROR LOF      | 185.25   | 185.25   | 3  | 61.75    |         |       |                      |         |
| TOTAL          | 9,600.3  |          | 29 |          |         |       |                      |         |

Seq SS, sequential sum of squares; Adj SS, adjusted sum of squares; d.f., degree of freedom; Adj MS, adjusted mean square; *F*, *F* statistic for the term; *P*, *P* value for the term (95% confidence).

**Table S2.** ANOVA table for arsenic removal (%) S1-FGG at 295 K.

| SOURCE         | SEQ SS   | ADJ SS   | DF | ADJ MS   | F       | P     | R <sup>2</sup>       | 0.9907  |
|----------------|----------|----------|----|----------|---------|-------|----------------------|---------|
| MAIN           | 15,485.6 |          | 3  |          |         |       | Adj R <sup>2</sup>   | 0.9865  |
| COAGULANT (A)  | 15,314.1 | 15,314.1 | 1  | 15,314.1 | 998.065 | 0.000 | Std Error            | 3.9171  |
| FLOCCULANT (B) | 27.563   | 27.563   | 1  | 27.563   | 1.7963  | 0.195 | F                    | 235.772 |
| ST (C)         | 144      | 144      | 1  | 144      | 9.3849  | 0.006 | Sig F                | 0       |
| 2 - WAY        | 37.75    |          | 3  |          |         |       | F <sub>LOF</sub>     | 90.942  |
| AB             | 12.5     | 12.5     | 1  | 12.5     | 0.8147  | 0.377 | Sig F <sub>LOF</sub> | 0.0     |
| AC             | 15.125   | 15.125   | 1  | 15.125   | 0.9857  | 0.333 |                      |         |
| BC             | 10.125   | 10.125   | 1  | 10.125   | 0.6599  | 0.426 |                      |         |
| QUADRATIC      | 17,035.2 |          | 3  |          |         |       |                      |         |
| AA             | 16,512.7 | 16,925.7 | 1  | 16,925.7 | 1,103.1 | 0.000 |                      |         |
| BB             | 107.16   | 141.346  | 1  | 141.346  | 9.212   | 0.007 |                      |         |
| CC             | 415.385  | 415.385  | 1  | 415.385  | 27.072  | 0.000 |                      |         |
| REGRESSION     | 32,558.6 | 32,558.6 | 9  | 3,617.62 |         |       |                      |         |
| ERROR          | 306.875  | 306.875  | 20 | 15.344   |         |       |                      |         |
| ERROR PURE     | 18       | 18       | 17 | 1.0588   |         |       |                      |         |
| ERROR LOF      | 288.875  | 288.875  | 3  | 96.292   |         |       |                      |         |
| TOTAL          | 32,865.5 |          | 29 |          |         |       |                      |         |

Seq SS, sequential sum of squares; Adj SS, adjusted sum of squares; d.f., degree of freedom; Adj MS, adjusted mean square; *F*, *F* statistic for the term; *P*, *P* value for the term (95% confidence).

**Table S3.** ANOVA table for arsenic removal (%) S1-XG at 295 K.

| SOURCE         | SEQ SS   | ADJ SS   | DF | ADJ MS   | F       | P     | R <sup>2</sup>       | 0.9583  |
|----------------|----------|----------|----|----------|---------|-------|----------------------|---------|
| MAIN           | 6,008.63 |          | 3  |          |         |       | Adj R <sup>2</sup>   | 0.9396  |
| COAGULANT (A)  | 5,329.0  | 5,329.0  | 1  | 5,329.0  | 135.232 | 0.000 | Std Error            | 6.2774  |
| FLOCCULANT (B) | 115.563  | 115.563  | 1  | 115.563  | 2.9326  | 0.102 | F                    | 51.108  |
| ST (C)         | 564.063  | 564.063  | 1  | 564.063  | 14.314  | 0.001 | Sig F                | 0.0     |
| 2 - WAY        | 1,451.12 |          | 3  |          |         |       | F <sub>LOF</sub>     | 257.042 |
| AB             | 1,352.0  | 1,352.0  | 1  | 1,352.0  | 34.309  | 0.000 | Sig F <sub>LOF</sub> | 0.0     |
| AC             | 8.0      | 8.0      | 1  | 8.0      | 0.203   | 0.657 |                      |         |
| BC             | 91.125   | 91.125   | 1  | 91.125   | 2.3125  | 0.144 |                      |         |
| QUADRATIC      | 10,666.0 |          | 3  |          |         |       |                      |         |
| AA             | 8,034.69 | 8,821.41 | 1  | 8,821.41 | 223.858 | 0.000 |                      |         |
| BB             | 2,325.27 | 2,442.72 | 1  | 2,442.72 | 61.988  | 0.000 |                      |         |
| CC             | 306.029  | 306.029  | 1  | 306.029  | 7.766   | 0.011 |                      |         |
| REGRESSION     | 18,125.7 | 18,125.7 | 9  | 2,013.97 |         |       |                      |         |
| ERROR          | 788.125  | 788.125  | 20 | 39.406   |         |       |                      |         |
| ERROR PURE     | 17       | 17       | 17 | 1        |         |       |                      |         |
| ERROR LOF      | 771.125  | 771.125  | 3  | 257.042  |         |       |                      |         |
| TOTAL          | 18,913.9 |          | 29 |          |         |       |                      |         |

Seq SS, sequential sum of squares; Adj SS, adjusted sum of squares; d.f., degree of freedom; Adj MS, adjusted mean square; *F*, *F* statistic for the term; *P*, *P* value for the term (95% confidence).

**Table S4.** ANOVA table for arsenic removal (%) S2-FSG at 295 K.

| SOURCE     | SEQ SS   | ADJ SS   | DF | ADJ MS   | F       | P     | R <sup>2</sup>       | 0.9407 |
|------------|----------|----------|----|----------|---------|-------|----------------------|--------|
| MAIN       | 873.625  |          | 3  |          |         |       | Adj R <sup>2</sup>   | 0.914  |
| COAGULANT  | 297.562  | 297.562  | 1  | 297.562  | 12.643  | 0.002 | Std                  | 4.8513 |
| (A)        |          |          |    |          |         |       | Error                |        |
| FLOCCULANT | 0.0625   | 0.0625   | 1  | 0.0625   | 0.0027  | 0.959 | F                    | 35.226 |
| (B)        |          |          |    |          |         |       |                      |        |
| ST (C)     | 576.0    | 576.0    | 1  | 576.0    | 24.474  | 0.000 | Sig F                | 0.0    |
| 2 - WAY    | 681.25   |          | 3  |          |         |       | F <sub>LOF</sub>     | 240.55 |
| AB         | 392.0    | 392.0    | 1  | 392.0    | 16.656  | 0.001 | Sig F <sub>LOF</sub> | 0.0    |
| AC         | 36.125   | 36.125   | 1  | 36.125   | 1.5349  | 0.230 |                      |        |
| BC         | 253.125  | 253.125  | 1  | 253.125  | 10.755  | 0.004 |                      |        |
| QUADRATIC  | 5,906.72 |          | 3  |          |         |       |                      |        |
| AA         | 1,499.15 | 2,061.55 | 1  | 2,061.55 | 87.594  | 0.000 |                      |        |
| BB         | 2,614.29 | 2,941.55 | 1  | 2,941.55 | 124.984 | 0.000 |                      |        |
| CC         | 1,793.28 | 1,793.28 | 1  | 1,793.28 | 76.195  | 0.000 |                      |        |
| REGRESSION | 7,461.59 | 7,461.59 | 9  | 829.066  |         |       |                      |        |
| ERROR      | 470.708  | 470.708  | 20 | 23.535   |         |       |                      |        |
| ERROR PURE | 10.833   | 10.833   | 17 | 0.6373   |         |       |                      |        |
| ERROR LOF  | 459.875  | 459.875  | 3  | 153.292  |         |       |                      |        |
| TOTAL      | 7,932.3  |          | 29 |          |         |       |                      |        |

Seq SS, sequential sum of squares; Adj SS, adjusted sum of squares; d.f., degree of freedom; Adj MS, adjusted mean square; *F*, *F* statistic for the term; *P*, *P* value for the term (95% confidence).

**Table S5.** ANOVA table for arsenic removal (%) S2-FGG at 295 K.

| SOURCE         | SEQ SS   | ADJ SS   | DF | ADJ MS   | F        | P     | R <sup>2</sup>       | 0.9953  |
|----------------|----------|----------|----|----------|----------|-------|----------------------|---------|
| MAIN           | 1,923.13 |          | 3  |          |          |       | Adj R <sup>2</sup>   | 0.9932  |
| COAGULANT (A)  | 1,701.56 | 1,701.56 | 1  | 1,701.56 | 598.352  | 0.000 | Std Error            | 1.6863  |
| FLOCCULANT (B) | 169.0    | 169.0    | 1  | 169.0    | 59.429   | 0.000 | F                    | 473.604 |
| ST (C)         | 52.562   | 52.562   | 1  | 52.562   | 18.484   | 0.000 | Sig F                | 0       |
| 2 - WAY        | 176.25   |          | 3  |          |          |       | F <sub>LOF</sub>     | 37.306  |
| AB             | 171.125  | 171.125  | 1  | 171.125  | 60.176   | 0.000 | Sig F <sub>LOF</sub> | 0.0     |
| AC             | 2.0      | 2.0      | 1  | 2.0      | 0.7033   | 0.412 |                      |         |
| BC             | 3.125    | 3.125    | 1  | 3.125    | 1.0989   | 0.307 |                      |         |
| QUADRATIC      | 10,021.9 |          | 3  |          |          |       |                      |         |
| AA             | 589.301  | 1,177.04 | 1  | 1,177.04 | 413.904  | 0.000 |                      |         |
| BB             | 4,863.27 | 5,584.62 | 1  | 5,584.62 | 1,963.82 | 0.000 |                      |         |
| CC             | 4,569.35 | 4,569.35 | 1  | 4,569.35 | 1,606.8  | 0.000 |                      |         |
| REGRESSION     | 12,121.3 | 12,121.3 | 9  | 1,346.81 |          |       |                      |         |
| ERROR          | 56.875   | 56.875   | 20 | 2.8438   |          |       |                      |         |
| ERROR PURE     | 7.5      | 7.5      | 17 | 0.4412   |          |       |                      |         |
| ERROR LOF      | 49.375   | 49.375   | 3  | 16.458   |          |       |                      |         |
| TOTAL          | 12,178.2 |          | 29 |          |          |       |                      |         |

Seq SS, sequential sum of squares; Adj SS, adjusted sum of squares; d.f., degree of freedom; Adj MS, adjusted mean square; *F*, *F* statistic for the term; *P*, *P* value for the term (95% confidence).

**Table S6.** ANOVA table for arsenic removal (%) S2-XG at 295 K.

| SOURCE         | SEQ SS   | ADJ SS   | DF | ADJ MS   | F       | P     | R <sup>2</sup>       | 0.9863  |
|----------------|----------|----------|----|----------|---------|-------|----------------------|---------|
| MAIN           | 3,886.38 |          | 3  |          |         |       | Adj R <sup>2</sup>   | 0.9801  |
| COAGULANT (A)  | 1,350.56 | 1,350.56 | 1  | 1,350.56 | 234.456 | 0.000 | Std Error            | 2.4001  |
| FLOCCULANT (B) | 2,450.25 | 2,450.25 | 1  | 2,450.25 | 425.36  | 0.000 | F                    | 159.783 |
| ST (C)         | 85.563   | 85.563   | 1  | 85.563   | 14.854  | 0.001 | Sig F                | 0.0     |
| 2 - WAY        | 188.625  |          | 3  |          |         |       | F <sub>LOF</sub>     | 19.605  |
| AB             | 128.0    | 128.0    | 1  | 128.0    | 22.221  | 0.000 | Sig F <sub>LOF</sub> | 0.0     |
| AC             | 0.125    | 0.125    | 1  | 0.125    | 0.0217  | 0.884 |                      |         |
| BC             | 60.5     | 60.5     | 1  | 60.5     | 10.503  | 0.004 |                      |         |
| QUADRATIC      | 4,208.76 |          | 3  |          |         |       |                      |         |
| AA             | 1,837.53 | 2,234.7  | 1  | 2,234.7  | 387.94  | 0.000 |                      |         |
| BB             | 2,020.07 | 2,139.39 | 1  | 2,139.39 | 371.395 | 0.000 |                      |         |



|            |          |          |    |         |       |       |
|------------|----------|----------|----|---------|-------|-------|
| CC         | 351.157  | 351.157  | 1  | 351.157 | 60.96 | 0.000 |
| REGRESSION | 8,283.76 | 8,283.76 | 9  | 920.418 |       |       |
| ERROR      | 115.208  | 115.208  | 20 | 5.7604  |       |       |
| ERROR PURE | 25.833   | 25.833   | 17 | 1.5196  |       |       |
| ERROR LOF  | 89.375   | 89.375   | 3  | 29.792  |       |       |
| TOTAL      | 8,398.97 |          | 29 |         |       |       |

Seq SS, sequential sum of squares; Adj SS, adjusted sum of squares; d.f., degree of freedom; Adj MS, adjusted mean square; *F*, *F* statistic for the term; *P*, *P* value for the term (95% confidence).

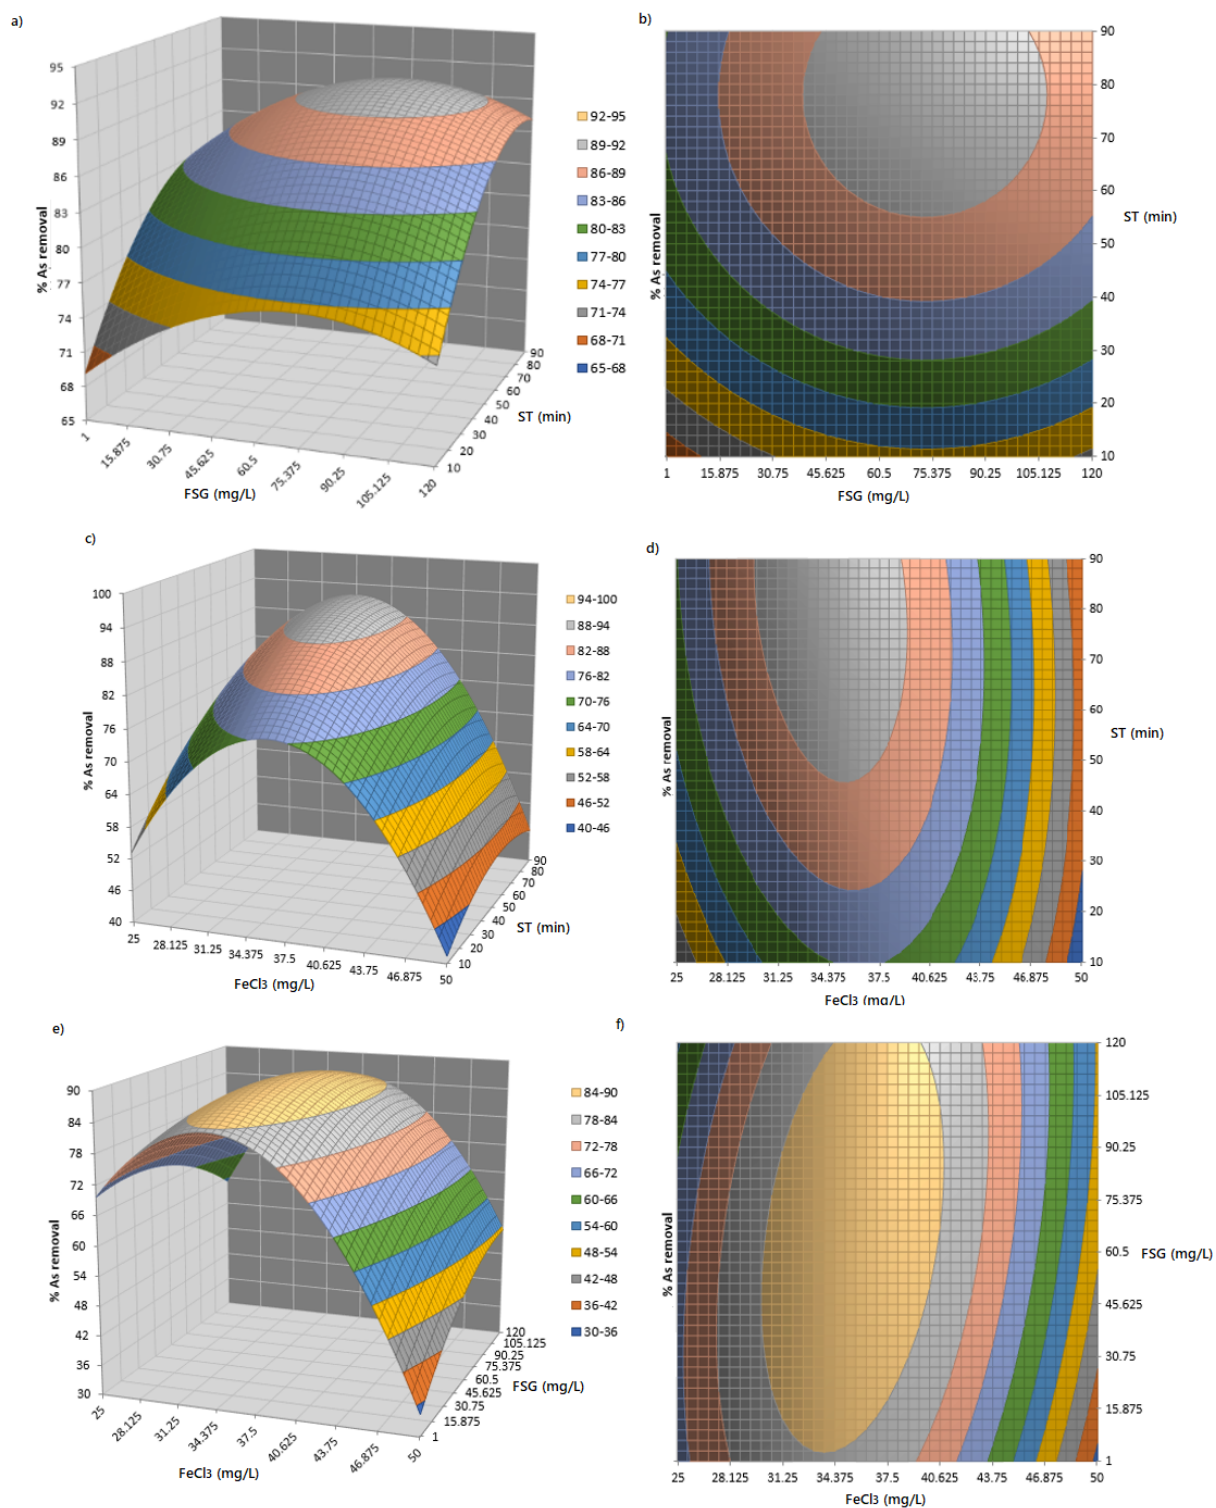

**Figure S4.** 3D Box-Behnken response surface (a, c, e) and 2D contour plots (b, d, f) of arsenic removal (S1) with FSG as a function of flocculant and settling time (a, b), coagulant and settling time (c, d), and coagulant and flocculant (e, f).

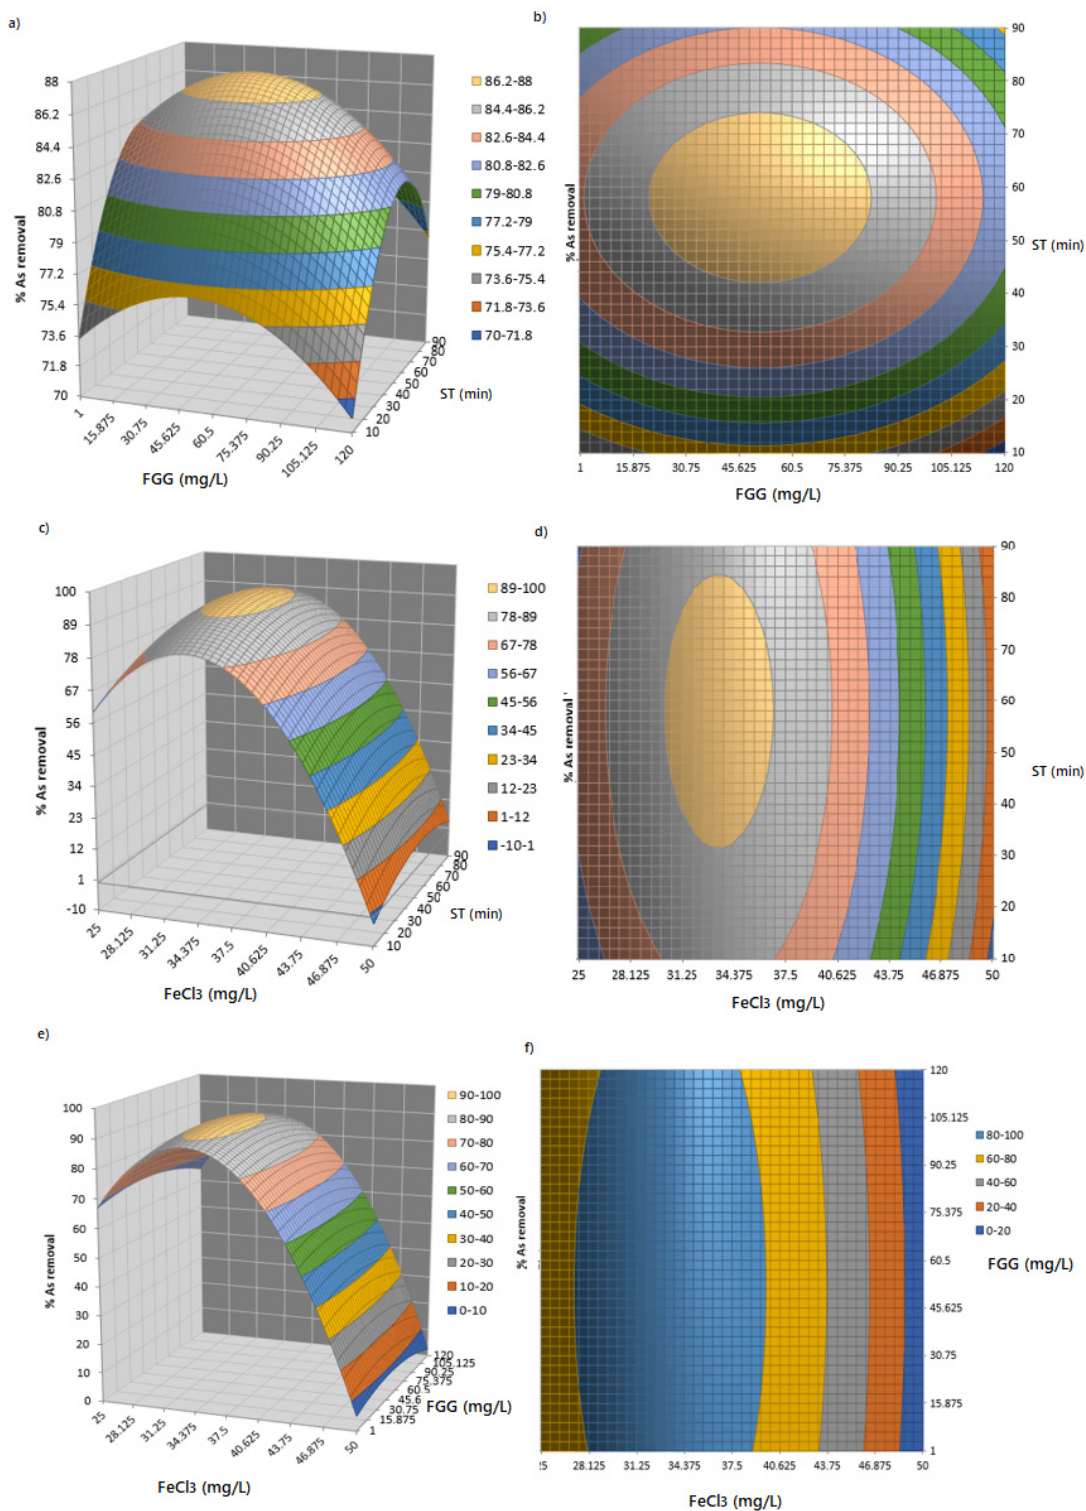

**Figure. S5.** 3D Box-Behnken response surface (a, c, e) and 2D contour plots (b, d, f) of arsenic removal (S1) with FGG as a function of flocculant and settling time (a, b), coagulant and settling time (c, d), and coagulant and flocculant (e, f).

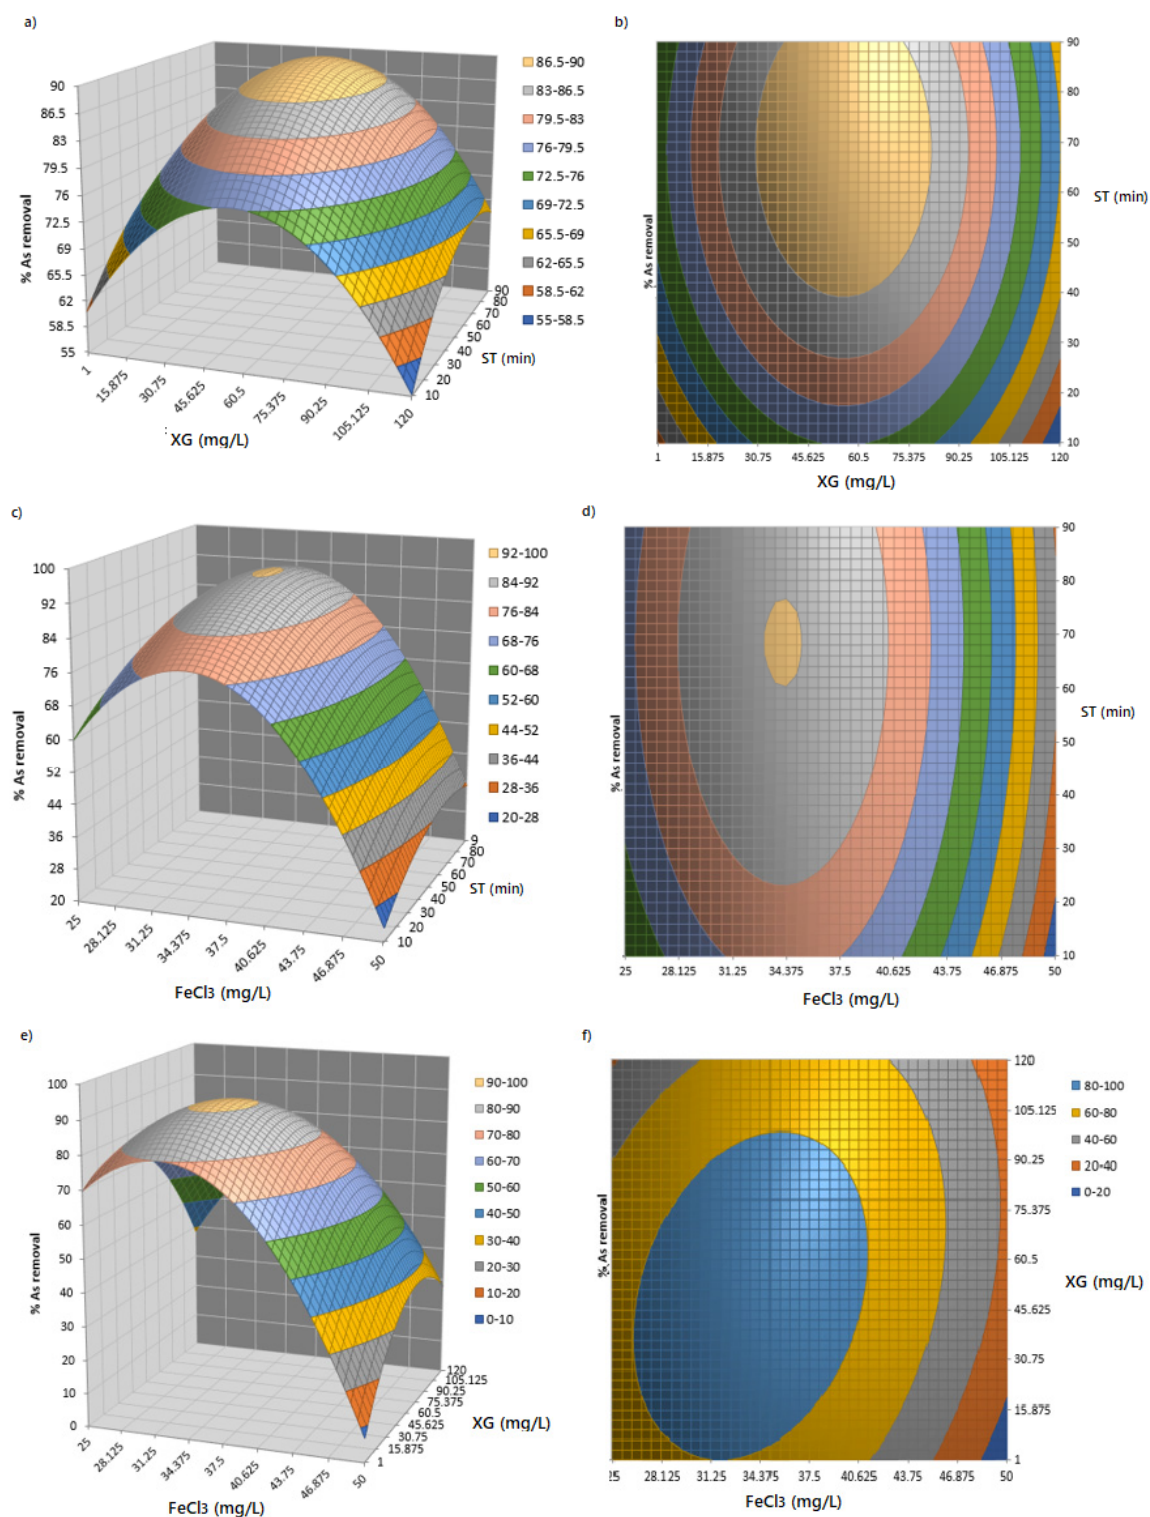

**Figure S6.** 3D Box-Behnken response surface (a, c, e) and 2D contour plots (b, d, f) of arsenic removal (S1) with XG as a function of flocculant and settling time (a, b), coagulant and settling time (c, d), and coagulant and flocculant (e, f).



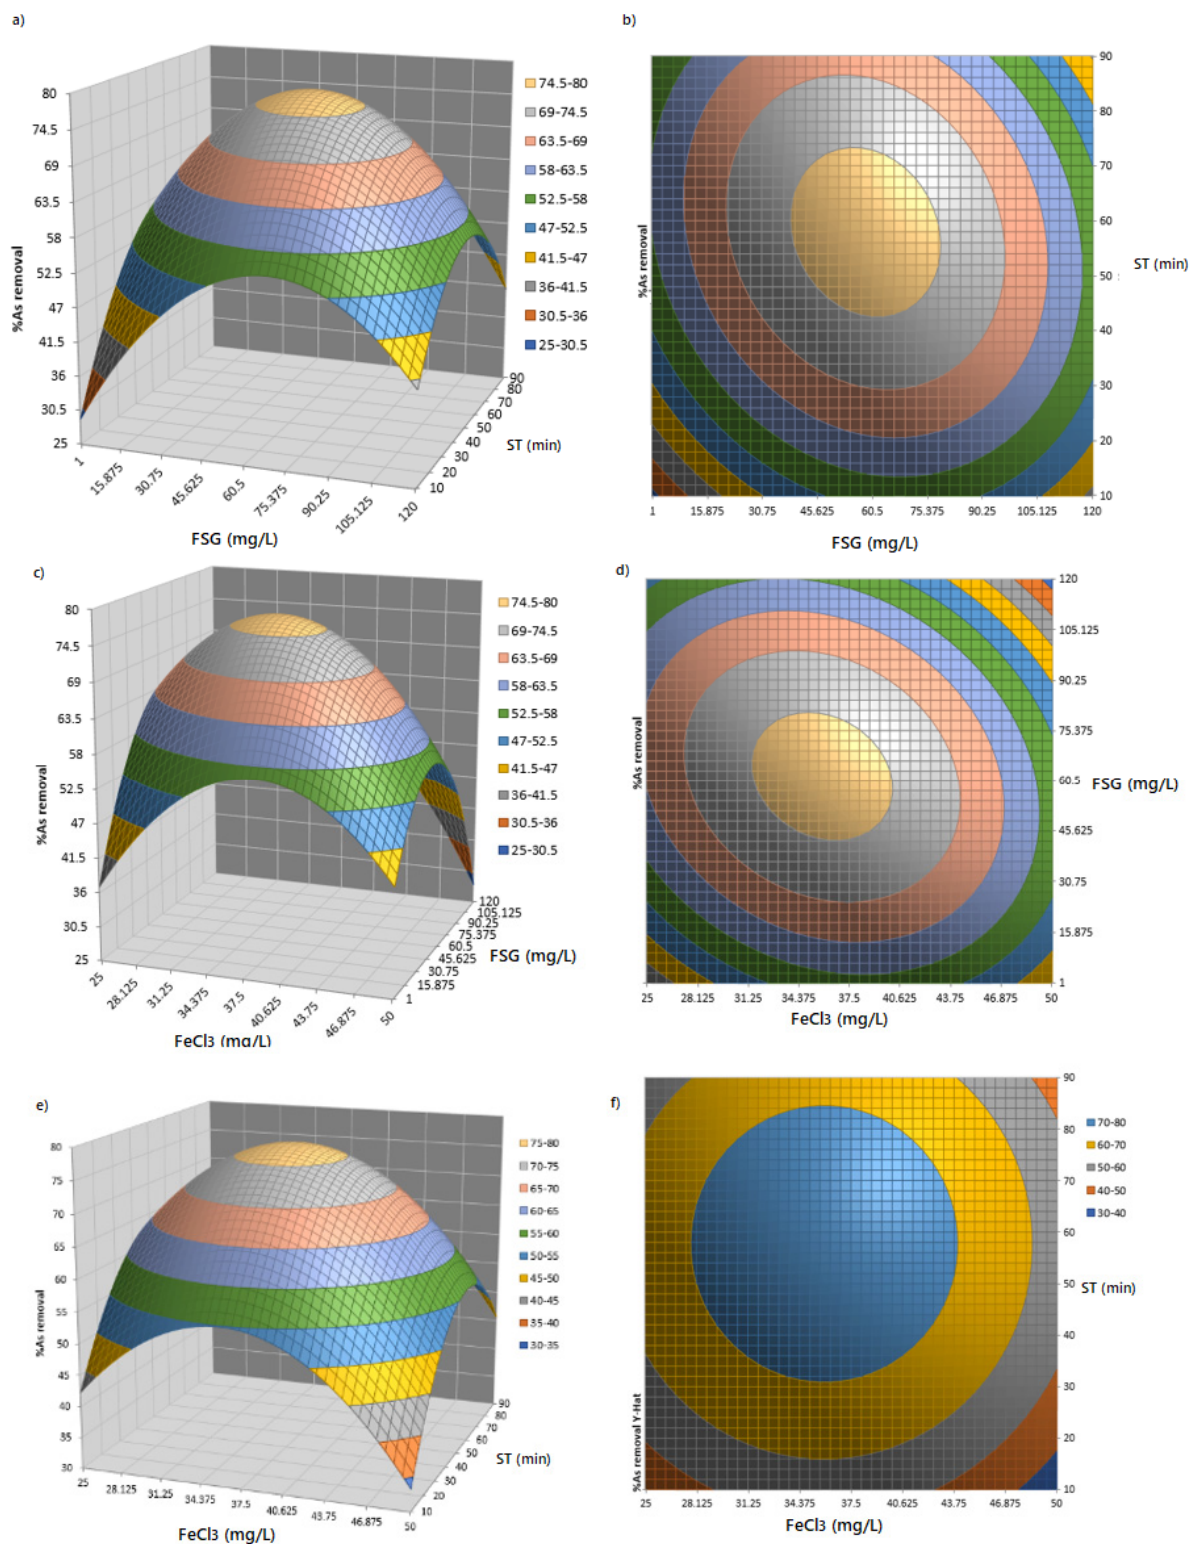

**Figure S7.** 3D Box-Behnken response surface (a, c, e) and 2D contour plots (b, d, f) of arsenic removal (S2) with FSG as a function of flocculant and settling time (a, b), coagulant and settling time (c, d), and coagulant and flocculant (e, f).

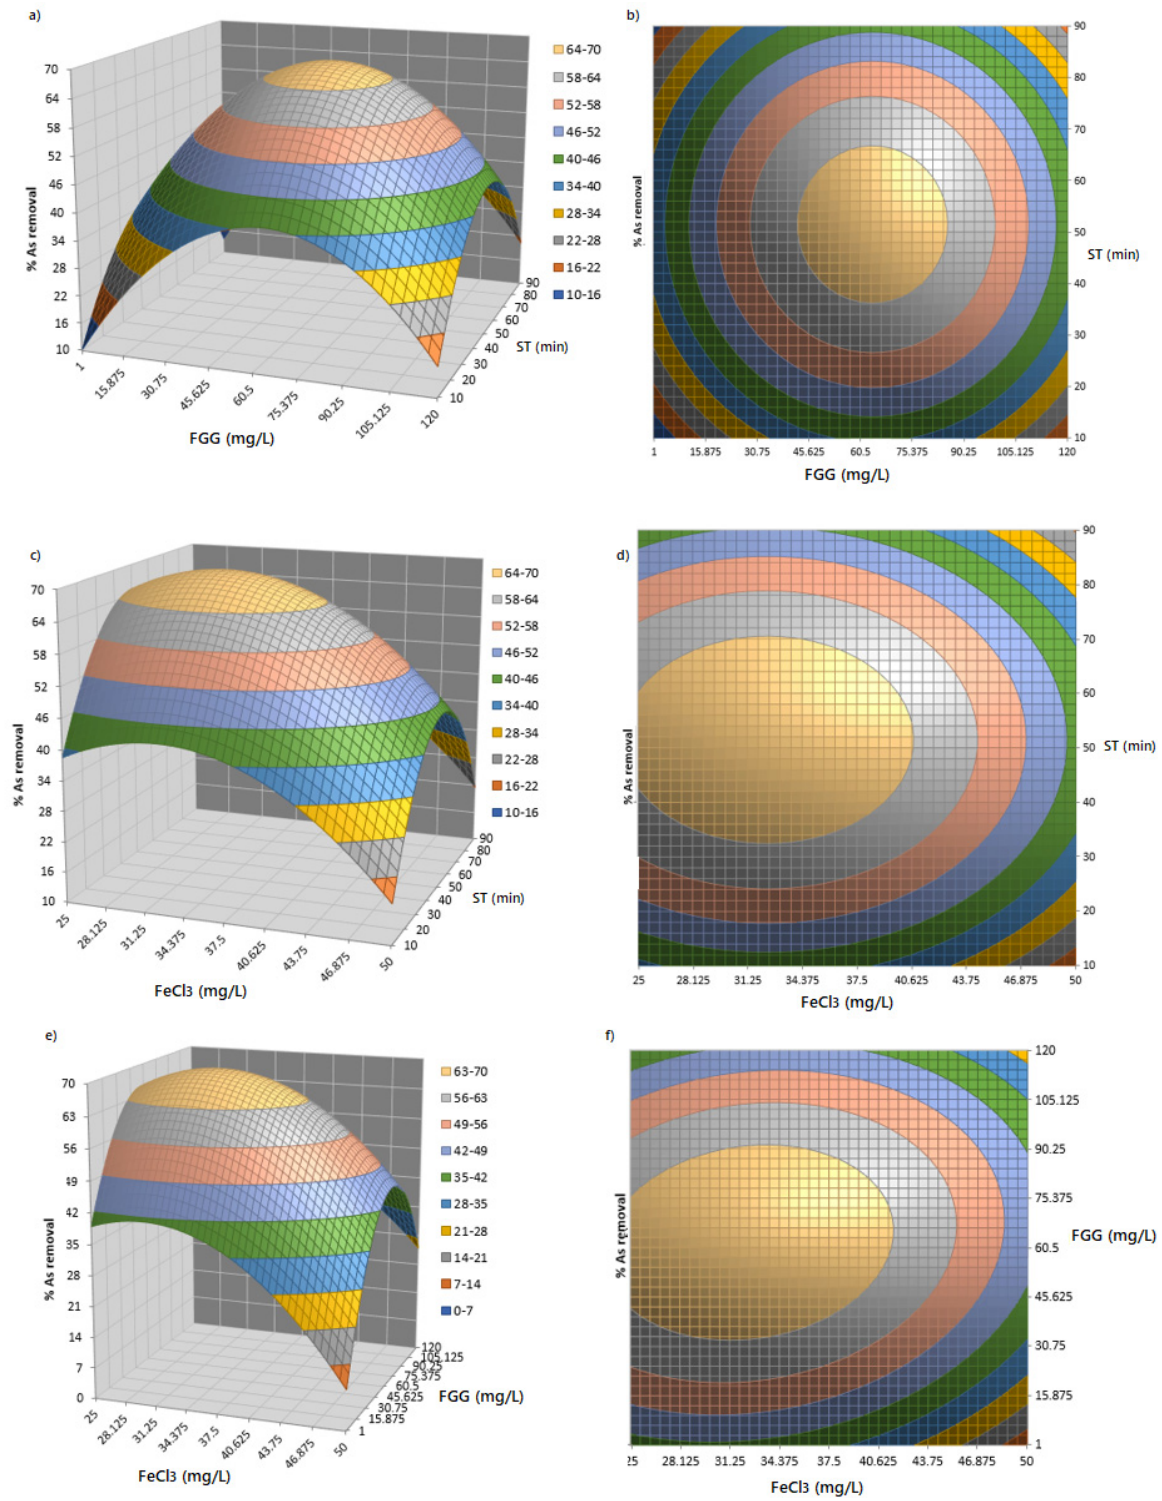

**Figure S8.** 3D Box-Behnken response surface (a, c, e) and 2D contour plots (b, d, f) of arsenic removal (S2) with FGG as a function of flocculant and settling time (a, b), coagulant and settling time (c, d), and coagulant and flocculant (e, f).

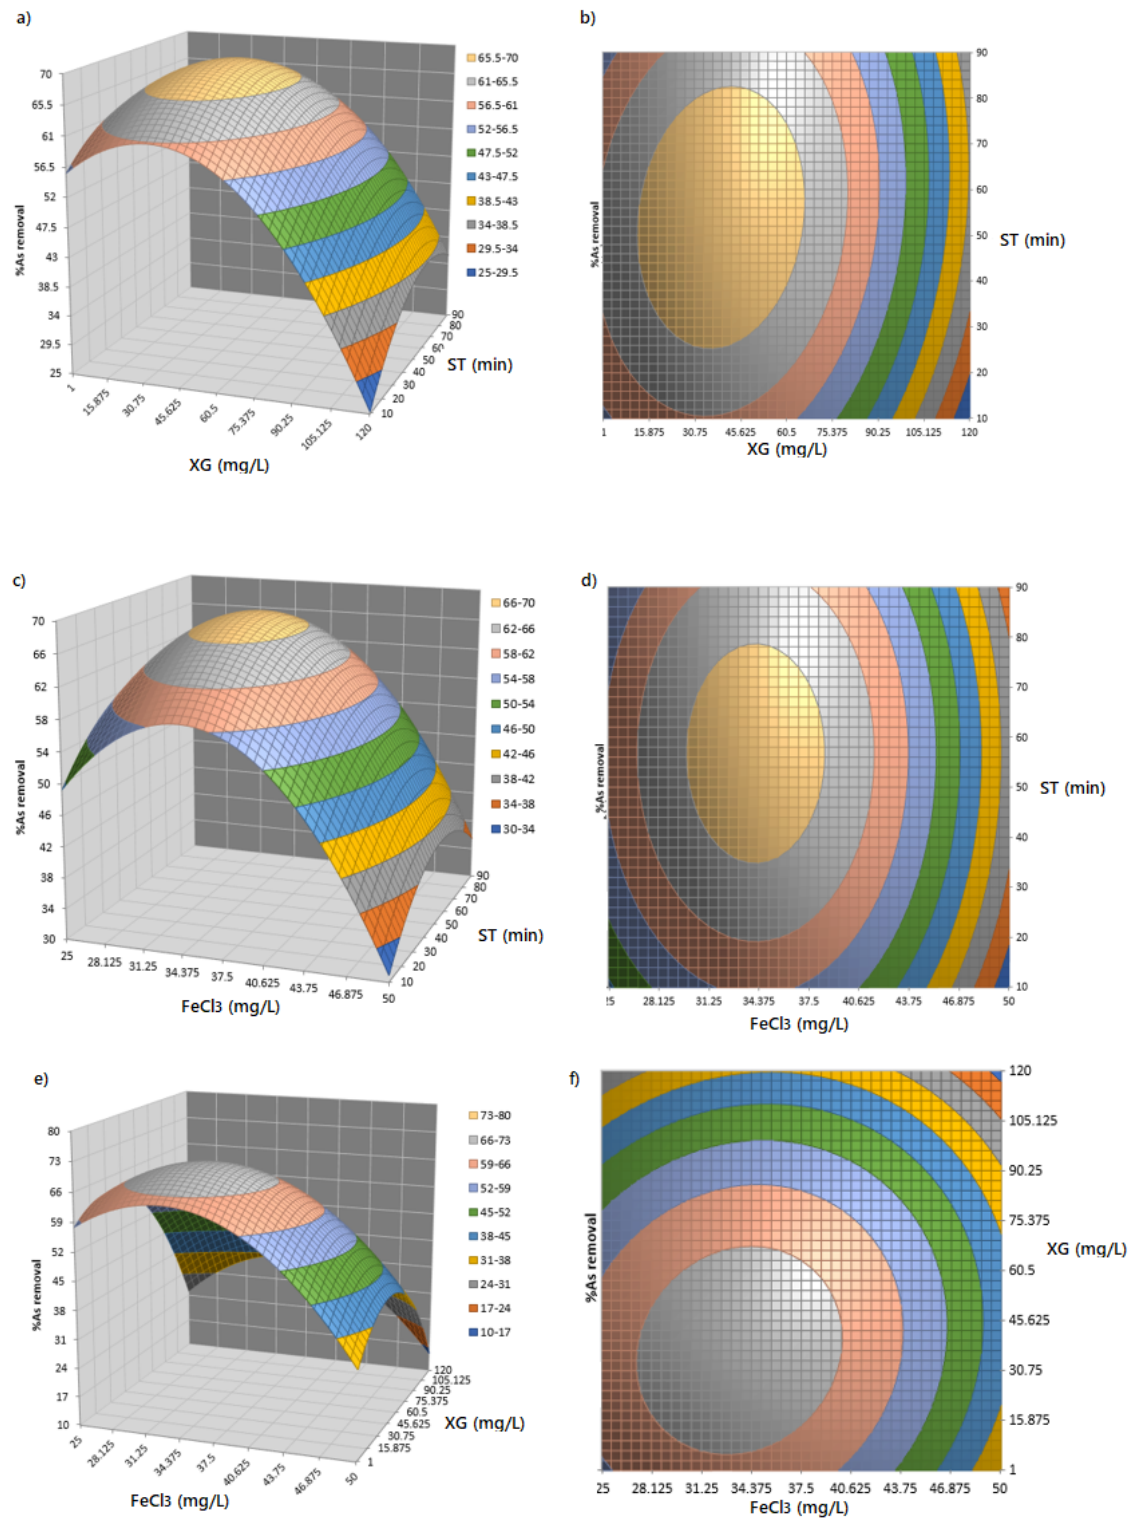

**Figure S9.** 3D Box-Behnken response surface (a, c, e) and 2D contour plots (b, d, f) of arsenic removal (S2) with XG as a function of flocculant and settling time (a, b), coagulant and settling time (c, d), and coagulant and flocculant (e, f).

**Table S7.** Box-Behnken experimental design matrix of three variables along with the experimental and calculated removal efficiency (S1; Roxarsone) at 295 K.

| RUN | A                    | B                    | C     | FSG       |          | FGG       |          | XG        |          |
|-----|----------------------|----------------------|-------|-----------|----------|-----------|----------|-----------|----------|
|     | FeCl <sub>3</sub>    | [GUM]                | ST    | Predicted | Expt     | Predicted | Expt     | Predicted | Expt     |
|     | (mgL <sup>-1</sup> ) | (mgL <sup>-1</sup> ) | (min) | RE(%)     | RE(%)    | RE(%)     | RE(%)    | RE(%)     | RE(%)    |
| 1   | 25                   | 1                    | 50    | 69.6      | 65.5±0.7 | 68.3      | 64.5±0.7 | 69.7      | 65.5±0.7 |
| 2   | 25                   | 120                  | 50    | 59.1      | 45.5±0.7 | 63.1      | 67±1.4   | 38.3      | 45.5±0.7 |
| 3   | 50                   | 1                    | 50    | 34.3      | 0±0.0    | 3.8       | 0±0.0    | 7.2       | 0±0.0    |
| 4   | 50                   | 120                  | 50    | 53.4      | 32±2.8   | 3.7       | 7.50±0.7 | 27.8      | 32±2.8   |
| 5   | 25                   | 60.5                 | 10    | 53.1      | 61±1.4   | 58.2      | 60±0.0   | 58.8      | 61±1.4   |
| 6   | 25                   | 60.5                 | 90    | 75.62     | 67.5±0.7 | 66.9      | 65±0.0   | 72.7      | 67.5±0.7 |
| 7   | 50                   | 60.5                 | 10    | 41.4      | 29.5±0.7 | 0.0       | 1±0.0    | 24.3      | 29.5±0.7 |
| 8   | 50                   | 60.5                 | 90    | 46.4      | 32±0.0   | 2.3       | 0.5±0.7  | 34.2      | 32±0.0   |
| 9   | 37.5                 | 1                    | 10    | 67.8      | 66±1.4   | 74.6      | 76.5±0.7 | 63.9      | 66±1.4   |
| 10  | 37.5                 | 1                    | 90    | 84.3      | 78.5±0.7 | 78.3      | 84±0.0   | 69.1      | 78.5±0.7 |
| 11  | 37.5                 | 120                  | 10    | 74.8      | 42.5±0.7 | 69.7      | 64±1.4   | 51.8      | 42.5±0.7 |
| 12  | 37.5                 | 120                  | 90    | 85.8      | 68.5±0.7 | 77.9      | 76±1.4   | 70.5      | 68.5±0.7 |
| 13  | 37.5                 | 60.5                 | 50    | 89.9      | 88.5±0.7 | 82.5      | 85.5±0.7 | 88.0      | 88.5±0.7 |
| 14  | 37.5                 | 60.5                 | 50    | 89.9      | 89±0.0   | 82.5      | 88.5±0.7 | 88.0      | 89±0.0   |
| 15  | 37.5                 | 60.5                 | 50    | 89.9      | 88±0.0   | 82.5      | 87±0.0   | 88.0      | 88±0.0   |

**Table S8.** Box-Behnken experimental design matrix of three variables along with the experimental and calculated removal efficiency (S2; Arsenate) at 295 K.

| RUN | A                     | B                     | C     | FSG       |          | FGG       |          | XG        |          |
|-----|-----------------------|-----------------------|-------|-----------|----------|-----------|----------|-----------|----------|
|     | FeCl <sub>3</sub>     | [GUM]                 | ST    | Predicted | Expt     | Predicted | Expt     | Predicted | Expt     |
|     | (mg L <sup>-1</sup> ) | (mg L <sup>-1</sup> ) | (min) | RE(%)     | RE(%)    | RE(%)     | RE(%)    | RE(%)     | RE(%)    |
| 1   | 25                    | 1                     | 50    | 36.9      | 42.5±0.7 | 39.1      | 39.5±0.7 | 57.8      | 58.5±0.7 |
| 2   | 25                    | 120                   | 50    | 50.7      | 49±0.0   | 36.3      | 34±0.0   | 25.1      | 22.50.7  |
| 3   | 50                    | 1                     | 50    | 42.3      | 44±0.0   | 9.2       | 11.5±0.7 | 31.4      | 34±1.4   |
| 4   | 50                    | 120                   | 50    | 28.1      | 22.5±0.7 | 24.9      | 24.5±0.7 | 14.7      | 14±1.4   |
| 5   | 25                    | 60.5                  | 10    | 40.1      | 41.5±0.7 | 39.0      | 40.5±0.7 | 49.1      | 51.5±0.7 |
| 6   | 25                    | 60.5                  | 90    | 56.3      | 51±0.0   | 41.6      | 42±0.0   | 54.0      | 53.5±0.7 |
| 7   | 50                    | 60.5                  | 10    | 35.7      | 41±1.4   | 17.4      | 17±0.0   | 31.0      | 31.5±0.7 |
| 8   | 50                    | 60.5                  | 90    | 43.4      | 42±1.4   | 21.9      | 20.5±0.7 | 35.4      | 33±0.0   |
| 9   | 37.5                  | 1                     | 10    | 29.1      | 22±0.0   | 9.4       | 7.5±0.7  | 55.6      | 52.5±0.7 |
| 10  | 37.5                  | 1                     | 90    | 52.3      | 52±0.0   | 14.3      | 13.5±0.7 | 54.7      | 54.5±0.7 |
| 11  | 37.5                  | 120                   | 10    | 40.2      | 40.5±0.7 | 17.2      | 18±1.4   | 25.3      | 25.5±0.7 |
| 12  | 37.5                  | 120                   | 90    | 40.9      | 48±1.4   | 19.6      | 21.5±0.7 | 35.4      | 38.5±2.1 |
| 13  | 37.5                  | 60.5                  | 50    | 76.2      | 76±0.0   | 67.5      | 67.5±0.7 | 66.7      | 67±2.8   |
| 14  | 37.5                  | 60.5                  | 50    | 76.2      | 77±0.0   | 67.5      | 67±0.0   | 66.7      | 66.5±0.7 |
| 15  | 37.5                  | 60.5                  | 50    | 76.2      | 75.5±0.7 | 67.5      | 68±0.0   | 66.7      | 66.5±2.1 |



**Table S9.** Observed and predicted organic arsenic removal efficiency for S1 (validation) at 295 K.

| Test | GU  | Independent variable                        |                               |             | As removal (%) |           |          |
|------|-----|---------------------------------------------|-------------------------------|-------------|----------------|-----------|----------|
|      |     | FeCl <sub>3</sub> dose (mgL <sup>-1</sup> ) | GUM dose (mgL <sup>-1</sup> ) | Settle time | Experimental   | Predicted | % Error* |
| 1    | FSG | 25                                          | 50.5                          | 10          | 58.6±0.3       | 53.7      | 8.4      |
| 2    | FSG | 28.5                                        | 1                             | 60          | 80.7±0.2       | 81.16     | 0.6      |
| 3    | FSG | 30                                          | 3                             | 35          | 77.8±0.7       | 76.7      | 1.4      |
| 4    | FGG | 25                                          | 50.5                          | 10          | 59.8±0.5       | 58.7      | 1.8      |
| 5    | FGG | 28.5                                        | 1                             | 60          | 81.6±0.3       | 83.2      | 2.0      |
| 6    | FGG | 30                                          | 3                             | 35          | 83.6±0.4       | 82.8      | 1.0      |
| 7    | XG  | 25                                          | 50.5                          | 10          | 59.4±0.8       | 60.5      | 1.9      |
| 8    | XG  | 28.5                                        | 1                             | 60          | 78.1±0.5       | 78.3      | 0.3      |
| 9    | XG  | 30                                          | 3                             | 35          | 77.6±3.3       | 77.0      | 0.8      |

\*% Error for experimental vs predicted value with less than 5% error.

**Table S10.** Observed and predicted inorganic arsenic removal efficiency S2 (validation) at 295 K.

| Test | GUM | Independent variable                        |                               |             | As removal (%) |           |          |
|------|-----|---------------------------------------------|-------------------------------|-------------|----------------|-----------|----------|
|      |     | FeCl <sub>3</sub> dose (mgL <sup>-1</sup> ) | GUM dose (mgL <sup>-1</sup> ) | Settle time | Experimental   | Predicted | % Error* |
|      |     | <sup>1)</sup>                               | <sup>1)</sup>                 | time        |                |           |          |
| 1    | FSG | 27                                          | 1                             | 35          | 36.2±0.6       | 35.6      | 1.7      |
| 2    | FSG | 29.5                                        | 2.5                           | 10          | 20.8±0.2       | 20.2      | 2.9      |
| 3    | FSG | 32                                          | 1.75                          | 60          | 55.8±0.1       | 54.8      | 1.8      |
| 4    | FGG | 27                                          | 1                             | 35          | 35.5±0.5       | 35.8      | 0.8      |
| 5    | FGG | 29.5                                        | 2.5                           | 10          | 14.4±0.3       | 14.2      | 1.4      |
| 6    | FGG | 32                                          | 1.75                          | 60          | 38.5±0.3       | 39.2      | 1.8      |
| 7    | XG  | 27                                          | 1                             | 35          | 59.8±1.1       | 60.5      | 1.2      |

|   |    |      |      |    |          |      |     |
|---|----|------|------|----|----------|------|-----|
| 8 | XG | 29.5 | 2.5  | 10 | 56.9±0.3 | 57.1 | 0.4 |
| 9 | XG | 32   | 1.75 | 60 | 63.1±0.7 | 63.7 | 1.0 |

\*% Error for experimental vs predicted value with less than 5% error.
